# Supplementary material for: Spinal cord involvement and cardiovascular autonomic dysfunction in Parkinson’s disease
Source: Research Square preprint supplement (doi:10.21203/rs.3.rs-7704958/v1), 2025-10-30
Supplement: Supplementary file 1 [file f49acd92af7d2f22f052b9a6.docx]

# **Supplementary tables**

**Table S1. Acquisition parameters**

| **Modality** | **T2w imaging** | **T1 relaxometry** | **Diffusion imaging** | **MTR imaging** |
| --- | --- | --- | --- | --- |
| **Sequence type** | 3D TSE SPACE | 3D MP2RAGE | 2D EPI | 3D GRE with and without MT pulse |
| **Acquisition plane** | sagittal | sagittal | axial | sagittal |
| **TR (ms)** | 1500 | 5000 | 600 | 24 |
| **TE (ms)** | 130 | 3.4 | 57 | 3.17 |
| **TI (ms)** | -- | TI1=700, TI2=2500 | -- | -- |
| **Flip angle (degrees)** | 150 | FA1=4  FA2=5 | -- | 25 |
| **Voxel size (mm3)** | 0.8×0.8×0.8 | 1×1×1 | 1.3×1.3×5 | 0.9×0.9×0.9 |
| **FOV size (mm2)** | 250×250 | 224×224 | 240×182.6 | 230×230 |
| **Number of averages** | 1.4 | 1 |  | 1 |
| **b-values** | -- | -- | 1000 | -- |
| **Directions** | -- | -- | 64 | -- |
| **Phase direction encoding** |  | -- | AP | -- |
| **Acceleration** | GRAPPA 2 | GRAPPA 3 | GRAPPA 2 | -- |
| **Acquisition time (minutes)** | 05:53 | 12:22 | 06:39 | 05:32 |

*Abbreviations: EPI, echo planar imaging; FA, flip angle; FOV, field-of-view; GRAPPA, Generalized Autocalibrating Partially Parallel Acquisitions; GRE, Gradient-Recalled Echo; MP2RAGE, Magnetization Prepared 2 Rapid Acquisition With Gradient-Recalled Echo; MT, magnetization transfer; MTR, magnetization transfer ratio; SPACE, Sampling Perfection with Application optimized Contrasts using different flip angle Evolution; TE, echo time; TI, inversion time; TR, repetition time.*

**Table S2. Definition of the spinal cord regions of interest in the SCT**

| **Descending tracts** | | |
| --- | --- | --- |
| **ID** | **Region** | **File** |
| 4 | WM left lateral corticospinal tract | PAM50_atlas_04.nii.gz |
| 5 | WM right lateral corticospinal tract | PAM50_atlas_05.nii.gz |
| 8 | WM left rubrospinal tract | PAM50_atlas_08.nii.gz |
| 9 | WM right rubrospinal tract | PAM50_atlas_09.nii.gz |
| 10 | WM left lateral reticulospinal tract | PAM50_atlas_10.nii.gz |
| 11 | WM right lateral reticulospinal tract | PAM50_atlas_11.nii.gz |
| 16 | WM left ventrolateral reticulospinal tract | PAM50_atlas_16.nii.gz |
| 17 | WM right ventrolateral reticulospinal tract | PAM50_atlas_17.nii.gz |
| 18 | WM left lateral vestibulospinal tract | PAM50_atlas_18.nii.gz |
| 19 | WM right lateral vestibulospinal tract | PAM50_atlas_19.nii.gz |
| 20 | WM left ventral reticulospinal tract | PAM50_atlas_20.nii.gz |
| 21 | WM right ventral reticulospinal tract | PAM50_atlas_21.nii.gz |
| 22 | WM left ventral corticospinal tract | PAM50_atlas_22.nii.gz |
| 23 | WM right ventral corticospinal tract | PAM50_atlas_23.nii.gz |
| 24 | WM left tectospinal tract | PAM50_atlas_24.nii.gz |
| 25 | WM right tectospinal tract | PAM50_atlas_25.nii.gz |
| 26 | WM left medial reticulospinal tract | PAM50_atlas_26.nii.gz |
| 27 | WM right medial reticulospinal tract | PAM50_atlas_27.nii.gz |
|  |  |  |
| **Ascending tracts** | | |
| **ID** | **Region** | **File** |
| 0 | WM left fasciculus gracilis | PAM50_atlas_00.nii.gz |
| 1 | WM right fasciculus gracilis | PAM50_atlas_01.nii.gz |
| 2 | WM left fasciculus cuneatus | PAM50_atlas_02.nii.gz |
| 3 | WM right fasciculus cuneatus | PAM50_atlas_03.nii.gz |
| 6 | WM left ventral spinocerebellar tract | PAM50_atlas_06.nii.gz |
| 7 | WM right ventral spinocerebellar tract | PAM50_atlas_07.nii.gz |
| 12 | WM left spinal lemniscus (spinothalamic and spinoreticular tracts) | PAM50_atlas_12.nii.gz |
| 13 | WM right spinal lemniscus (spinothalamic and spinoreticular tracts) | PAM50_atlas_13.nii.gz |
| 14 | WM left spino-olivary tract | PAM50_atlas_14.nii.gz |
| 15 | WM right spino-olivary tract | PAM50_atlas_15.nii.gz |
|  |  |  |
| **Ventral horns** | | |
| **ID** | **Region** | **File** |
| 30 | GM left ventral horn | PAM50_atlas_30.nii.gz |
| 31 | GM right ventral horn | PAM50_atlas_31.nii.gz |
|  |  |  |
| **Intermediate zone** | | |
| **ID** | **Region** | **File** |
| 32 | GM left intermediate zone | PAM50_atlas_32.nii.gz |
| 33 | GM right intermediate zone | PAM50_atlas_33.nii.gz |

*Abbreviations: GM, gray matter; SCT, Spinal Toolbox; WM, white matter.*

**Table S3. Groups comparisons of MRI measurements at the cervicothoracic junction (C6-T1)**

HCs vs all PD patients:

| **Biomarker** | **Region** | **F value** | **p-value** | **adjusted p** |
| --- | --- | --- | --- | --- |
| MTR | ventral horns | 6.54 | 0.01 | 0.06 |
| MTR | intermediate zone | 2.51 | 0.12 | 0.16 |
| MTR | descending | 4.08 | 0.05 | 0.10 |
| MTR | ascending | 1.17 | 0.28 | 0.28 |
| T1 | ventral horns | 5.17 | 0.03 | 0.11 |
| T1 | intermediate zone | 0.11 | 0.74 | 0.74 |
| T1 | descending | 0.28 | 0.60 | 0.74 |
| T1 | ascending | 1.00 | 0.32 | 0.64 |
| MD | ventral horns | 0.29 | 0.59 | 0.59 |
| MD | intermediate zone | 1.43 | 0.24 | 0.32 |
| MD | descending | 4.62 | 0.04 | 0.15 |
| MD | ascending | 2.11 | 0.15 | 0.31 |
| FA | ventral horns | 0.07 | 0.79 | 0.79 |
| FA | intermediate zone | 0.19 | 0.66 | 0.79 |
| FA | descending | 2.48 | 0.12 | 0.49 |
| FA | ascending | 0.67 | 0.42 | 0.79 |

HCs vs PDRBD(+) and PDRBD(-) patients:

| **Biomarker** | **Region** | **F value** | **p-value** | **adjusted p** |
| --- | --- | --- | --- | --- |
| MTR | ventral horns | 4.11 | 0.02 | 0.09 |
| MTR | intermediate zone | 1.28 | 0.29 | 0.38 |
| MTR | descending | 2.00 | 0.15 | 0.30 |
| MTR | ascending | 0.58 | 0.56 | 0.56 |
| T1 | ventral horns | 2.54 | 0.09 | 0.36 |
| T1 | intermediate zone | 1.08 | 0.35 | 0.57 |
| T1 | descending | 0.59 | 0.56 | 0.57 |
| T1 | ascending | 0.57 | 0.57 | 0.57 |
| MD | ventral horns | 0.15 | 0.86 | 0.86 |
| MD | intermediate zone | 0.85 | 0.43 | 0.58 |
| MD | descending | 2.57 | 0.09 | 0.35 |
| MD | ascending | 1.14 | 0.33 | 0.58 |
| FA | ventral horns | 0.28 | 0.75 | 0.81 |
| FA | intermediate zone | 0.21 | 0.81 | 0.81 |
| FA | descending | 2.44 | 0.10 | 0.40 |
| FA | ascending | 0.61 | 0.55 | 0.81 |

Between-group differences in MRI measurements at the cervicothoracic junction (C6-T1) were evaluated first between HCs and all PD patients, then, between HCs, PDRBD(+), and PDRBD(-) patients by using linear models (LMs, one model per region: ascending and descending tracts, intermediolateral zone, ventral horns; and per MRI marker: CSA, T1, FA, MD, MTR), with group as the main factor, and age and sex included as covariates of no interest. The group effect was tested using a Type II analysis of variance (ANOVA) F-test. P-values from the F-tests were corrected for multiple comparisons across regions using FDR, with each MRI marker type treated as a separate family.

*Abbreviations: FA, fractional anisotropy; FDR, false discovery rate; HC, healthy controls; MD, mean diffusivity; MTR, magnetization transfer ratio; PD, Parkinson’s disease; RBD, rapid-eye movement sleep behavior disorder.*

**Table S4. Selection of 26 MRI biomarkers based on Kruskal-Wallis chi-square tests across regions, MRI Modalities, and vertebral levels.**

| **Biomarker** | **Region** | **Vertebra level** | **Chi2** | **Df** | **p-value** | **adjusted p** | **Selected (raw p < 0.15)** |
| --- | --- | --- | --- | --- | --- | --- | --- |
| MTR | descending | C6 | 9.646 | 2 | 0.0080 | 0.7634 | yes |
| FA | descending | C7 | 9.252 | 2 | 0.0098 | 0.7634 | yes |
| T1 | descending | C4 | 8.037 | 2 | 0.0180 | 0.7634 | yes |
| MD | descending | T5 | 8.028 | 2 | 0.0181 | 0.7634 | yes |
| MTR | VH | C6 | 7.390 | 2 | 0.0248 | 0.7634 | yes |
| T1 | descending | C3 | 6.763 | 2 | 0.0340 | 0.7634 | yes |
| MTR | VH | C2 | 6.600 | 2 | 0.0369 | 0.7634 | yes |
| MD | descending | C2 | 6.301 | 2 | 0.0428 | 0.7634 | yes |
| MTR | IZ | T3 | 6.280 | 2 | 0.0433 | 0.7634 | yes |
| T1 | IZ | T2 | 5.982 | 2 | 0.0502 | 0.7634 | yes |
| MD | descending | C7 | 5.708 | 2 | 0.0576 | 0.7634 | yes |
| MTR | IZ | T5 | 5.652 | 2 | 0.0592 | 0.7634 | yes |
| T1 | VH | C7 | 5.392 | 2 | 0.0675 | 0.7634 | yes |
| T1 | IZ | C6 | 5.382 | 2 | 0.0678 | 0.7634 | yes |
| FA | descending | C6 | 5.349 | 2 | 0.0690 | 0.7634 | yes |
| MD | IZ | C6 | 5.337 | 2 | 0.0694 | 0.7634 | yes |
| FA | descending | C4 | 4.725 | 2 | 0.0942 | 0.8905 | yes |
| MD | descending | C4 | 4.429 | 2 | 0.1092 | 0.8905 | yes |
| MTR | VH | C7 | 4.315 | 2 | 0.1156 | 0.8905 | yes |
| MTR | descending | C5 | 4.284 | 2 | 0.1174 | 0.8905 | yes |
| MTR | IZ | C7 | 4.198 | 2 | 0.1226 | 0.8905 | yes |
| MTR | descending | C4 | 4.198 | 2 | 0.1226 | 0.8905 | yes |
| MTR | VH | T2 | 4.153 | 2 | 0.1254 | 0.8905 | yes |
| FA | descending | T5 | 4.132 | 2 | 0.1267 | 0.8905 | yes |
| T1 | ascending | C2 | 3.919 | 2 | 0.1409 | 0.8905 | yes |
| MD | ascending | C3 | 3.876 | 2 | 0.1440 | 0.8905 | yes |
| T1 | IZ | T5 | 3.708 | 2 | 0.1566 | 0.8905 | no |
| MTR | IZ | T4 | 3.662 | 2 | 0.1602 | 0.8905 | no |
| MD | IZ | C4 | 3.659 | 2 | 0.1605 | 0.8905 | no |
| T1 | VH | T1 | 3.503 | 2 | 0.1735 | 0.8905 | no |
| MD | descending | T4 | 3.440 | 2 | 0.1791 | 0.8905 | no |
| FA | ascending | C2 | 3.435 | 2 | 0.1795 | 0.8905 | no |
| FA | descending | T1 | 3.412 | 2 | 0.1816 | 0.8905 | no |
| MTR | VH | T4 | 3.364 | 2 | 0.1860 | 0.8905 | no |
| MD | ascending | C4 | 3.311 | 2 | 0.1910 | 0.8905 | no |
| FA | ascending | C7 | 3.234 | 2 | 0.1985 | 0.8905 | no |
| MTR | descending | T4 | 3.227 | 2 | 0.1992 | 0.8905 | no |
| FA | ascending | C3 | 3.197 | 2 | 0.2022 | 0.8905 | no |
| MD | descending | C3 | 3.127 | 2 | 0.2094 | 0.8905 | no |
| FA | ascending | C6 | 3.103 | 2 | 0.2120 | 0.8905 | no |
| MD | ascending | C7 | 3.090 | 2 | 0.2134 | 0.8905 | no |
| MD | ascending | T4 | 3.054 | 2 | 0.2172 | 0.8905 | no |
| MD | ascending | C2 | 3.019 | 2 | 0.2210 | 0.8905 | no |
| MTR | IZ | C6 | 2.993 | 2 | 0.2239 | 0.8905 | no |
| T1 | ascending | C3 | 2.858 | 2 | 0.2396 | 0.8905 | no |
| T1 | descending | C2 | 2.858 | 2 | 0.2396 | 0.8905 | no |
| MTR | descending | C2 | 2.810 | 2 | 0.2454 | 0.8905 | no |
| FA | descending | C3 | 2.679 | 2 | 0.2620 | 0.8905 | no |
| MTR | VH | T5 | 2.652 | 2 | 0.2655 | 0.8905 | no |
| FA | ascending | T4 | 2.618 | 2 | 0.2700 | 0.8905 | no |
| T1 | IZ | T4 | 2.603 | 2 | 0.2721 | 0.8905 | no |
| T1 | VH | C6 | 2.535 | 2 | 0.2816 | 0.8905 | no |
| T1 | descending | C6 | 2.494 | 2 | 0.2874 | 0.8905 | no |
| T1 | descending | T4 | 2.397 | 2 | 0.3016 | 0.8905 | no |
| MTR | VH | T1 | 2.395 | 2 | 0.3020 | 0.8905 | no |
| T1 | ascending | C6 | 2.379 | 2 | 0.3044 | 0.8905 | no |
| MTR | descending | C7 | 2.375 | 2 | 0.3049 | 0.8905 | no |
| MTR | ascending | C6 | 2.363 | 2 | 0.3068 | 0.8905 | no |
| FA | descending | C2 | 2.335 | 2 | 0.3112 | 0.8905 | no |
| MD | ascending | T5 | 2.330 | 2 | 0.3119 | 0.8905 | no |
| MD | descending | C6 | 2.326 | 2 | 0.3126 | 0.8905 | no |
| T1 | ascending | C4 | 2.319 | 2 | 0.3137 | 0.8905 | no |
| MTR | descending | C3 | 2.083 | 2 | 0.3529 | 0.9048 | no |
| T1 | descending | T2 | 2.065 | 2 | 0.3562 | 0.9048 | no |
| MD | ascending | C6 | 2.035 | 2 | 0.3615 | 0.9048 | no |
| FA | VH | T2 | 2.026 | 2 | 0.3632 | 0.9048 | no |
| MTR | VH | C5 | 2.004 | 2 | 0.3672 | 0.9048 | no |
| MTR | ascending | C7 | 1.992 | 2 | 0.3693 | 0.9048 | no |
| MD | IZ | C3 | 1.964 | 2 | 0.3745 | 0.9048 | no |
| MD | VH | C4 | 1.963 | 2 | 0.3747 | 0.9048 | no |
| FA | descending | T4 | 1.943 | 2 | 0.3785 | 0.9048 | no |
| T1 | IZ | C7 | 1.937 | 2 | 0.3797 | 0.9048 | no |
| MTR | VH | C3 | 1.881 | 2 | 0.3903 | 0.9048 | no |
| FA | IZ | C6 | 1.847 | 2 | 0.3972 | 0.9048 | no |
| MD | descending | T3 | 1.764 | 2 | 0.4140 | 0.9048 | no |
| FA | IZ | T2 | 1.763 | 2 | 0.4141 | 0.9048 | no |
| MTR | VH | T3 | 1.711 | 2 | 0.4252 | 0.9048 | no |
| T1 | VH | T2 | 1.707 | 2 | 0.4259 | 0.9048 | no |
| MD | VH | C2 | 1.702 | 2 | 0.4270 | 0.9048 | no |
| FA | IZ | T3 | 1.696 | 2 | 0.4282 | 0.9048 | no |
| T1 | ascending | T1 | 1.664 | 2 | 0.4352 | 0.9048 | no |
| FA | VH | T3 | 1.651 | 2 | 0.4380 | 0.9048 | no |
| FA | descending | C5 | 1.642 | 2 | 0.4399 | 0.9048 | no |
| MD | IZ | T5 | 1.635 | 2 | 0.4416 | 0.9048 | no |
| MTR | descending | T5 | 1.617 | 2 | 0.4455 | 0.9048 | no |
| FA | ascending | C4 | 1.604 | 2 | 0.4484 | 0.9048 | no |
| T1 | IZ | T1 | 1.599 | 2 | 0.4495 | 0.9048 | no |
| T1 | IZ | C5 | 1.559 | 2 | 0.4587 | 0.9048 | no |
| T1 | descending | T5 | 1.547 | 2 | 0.4613 | 0.9048 | no |
| MTR | IZ | T2 | 1.541 | 2 | 0.4627 | 0.9048 | no |
| FA | VH | T1 | 1.469 | 2 | 0.4798 | 0.9280 | no |
| T1 | descending | T3 | 1.443 | 2 | 0.4859 | 0.9295 | no |
| T1 | IZ | T3 | 1.406 | 2 | 0.4950 | 0.9362 | no |
| MTR | IZ | T1 | 1.386 | 2 | 0.5000 | 0.9362 | no |
| MD | VH | T1 | 1.350 | 2 | 0.5093 | 0.9435 | no |
| FA | IZ | C2 | 1.312 | 2 | 0.5188 | 0.9439 | no |
| MD | VH | T5 | 1.296 | 2 | 0.5231 | 0.9439 | no |
| FA | IZ | T4 | 1.279 | 2 | 0.5275 | 0.9439 | no |
| T1 | ascending | T5 | 1.257 | 2 | 0.5333 | 0.9439 | no |
| T1 | descending | C5 | 1.246 | 2 | 0.5363 | 0.9439 | no |
| FA | IZ | C4 | 1.195 | 2 | 0.5501 | 0.9586 | no |
| MTR | ascending | C5 | 1.064 | 2 | 0.5873 | 0.9747 | no |
| FA | ascending | T3 | 1.059 | 2 | 0.5888 | 0.9747 | no |
| T1 | IZ | C2 | 1.055 | 2 | 0.5900 | 0.9747 | no |
| FA | VH | C7 | 1.043 | 2 | 0.5936 | 0.9747 | no |
| T1 | IZ | C4 | 1.028 | 2 | 0.5980 | 0.9747 | no |
| FA | ascending | T2 | 1.025 | 2 | 0.5989 | 0.9747 | no |
| T1 | ascending | T3 | 1.025 | 2 | 0.5991 | 0.9747 | no |
| T1 | IZ | C3 | 0.973 | 2 | 0.6148 | 0.9747 | no |
| MTR | IZ | C2 | 0.954 | 2 | 0.6208 | 0.9747 | no |
| MD | VH | T2 | 0.931 | 2 | 0.6277 | 0.9747 | no |
| MTR | ascending | T5 | 0.912 | 2 | 0.6339 | 0.9747 | no |
| MD | IZ | T4 | 0.905 | 2 | 0.6361 | 0.9747 | no |
| MTR | ascending | C4 | 0.872 | 2 | 0.6466 | 0.9747 | no |
| T1 | ascending | T4 | 0.858 | 2 | 0.6513 | 0.9747 | no |
| MD | IZ | T1 | 0.837 | 2 | 0.6581 | 0.9747 | no |
| FA | IZ | C7 | 0.809 | 2 | 0.6674 | 0.9747 | no |
| FA | VH | T4 | 0.777 | 2 | 0.6780 | 0.9747 | no |
| T1 | descending | T1 | 0.757 | 2 | 0.6850 | 0.9747 | no |
| T1 | descending | C7 | 0.746 | 2 | 0.6885 | 0.9747 | no |
| FA | ascending | T5 | 0.716 | 2 | 0.6992 | 0.9747 | no |
| FA | descending | T2 | 0.707 | 2 | 0.7023 | 0.9747 | no |
| FA | ascending | C5 | 0.664 | 2 | 0.7176 | 0.9747 | no |
| FA | VH | C3 | 0.658 | 2 | 0.7195 | 0.9747 | no |
| MTR | ascending | T4 | 0.654 | 2 | 0.7212 | 0.9747 | no |
| MTR | ascending | C3 | 0.653 | 2 | 0.7214 | 0.9747 | no |
| FA | IZ | T1 | 0.652 | 2 | 0.7219 | 0.9747 | no |
| MTR | descending | T2 | 0.651 | 2 | 0.7220 | 0.9747 | no |
| MD | VH | C3 | 0.637 | 2 | 0.7274 | 0.9747 | no |
| FA | descending | T3 | 0.608 | 2 | 0.7377 | 0.9747 | no |
| FA | VH | C2 | 0.599 | 2 | 0.7413 | 0.9747 | no |
| FA | VH | T5 | 0.591 | 2 | 0.7442 | 0.9747 | no |
| MD | descending | T1 | 0.586 | 2 | 0.7460 | 0.9747 | no |
| MTR | ascending | C2 | 0.551 | 2 | 0.7594 | 0.9747 | no |
| MD | VH | T3 | 0.532 | 2 | 0.7665 | 0.9747 | no |
| MTR | ascending | T3 | 0.530 | 2 | 0.7671 | 0.9747 | no |
| MD | descending | T2 | 0.471 | 2 | 0.7901 | 0.9747 | no |
| MD | VH | T4 | 0.469 | 2 | 0.7910 | 0.9747 | no |
| T1 | VH | C4 | 0.464 | 2 | 0.7928 | 0.9747 | no |
| MD | ascending | T1 | 0.453 | 2 | 0.7972 | 0.9747 | no |
| MD | IZ | C7 | 0.423 | 2 | 0.8095 | 0.9747 | no |
| FA | ascending | T1 | 0.422 | 2 | 0.8096 | 0.9747 | no |
| T1 | VH | T5 | 0.408 | 2 | 0.8154 | 0.9747 | no |
| T1 | ascending | C5 | 0.403 | 2 | 0.8177 | 0.9747 | no |
| T1 | ascending | C7 | 0.397 | 2 | 0.8200 | 0.9747 | no |
| MTR | IZ | C3 | 0.393 | 2 | 0.8215 | 0.9747 | no |
| T1 | VH | T3 | 0.378 | 2 | 0.8278 | 0.9747 | no |
| FA | VH | C6 | 0.362 | 2 | 0.8345 | 0.9747 | no |
| MD | VH | C7 | 0.353 | 2 | 0.8382 | 0.9747 | no |
| MTR | IZ | C4 | 0.336 | 2 | 0.8454 | 0.9747 | no |
| MD | IZ | T2 | 0.322 | 2 | 0.8514 | 0.9747 | no |
| T1 | ascending | T2 | 0.320 | 2 | 0.8523 | 0.9747 | no |
| T1 | VH | C5 | 0.317 | 2 | 0.8535 | 0.9747 | no |
| MD | ascending | T2 | 0.303 | 2 | 0.8596 | 0.9747 | no |
| MD | descending | C5 | 0.293 | 2 | 0.8638 | 0.9747 | no |
| FA | VH | C4 | 0.278 | 2 | 0.8700 | 0.9747 | no |
| T1 | VH | C2 | 0.272 | 2 | 0.8727 | 0.9747 | no |
| MTR | ascending | T2 | 0.256 | 2 | 0.8798 | 0.9747 | no |
| FA | IZ | T5 | 0.252 | 2 | 0.8815 | 0.9747 | no |
| FA | IZ | C3 | 0.227 | 2 | 0.8929 | 0.9747 | no |
| FA | IZ | C5 | 0.203 | 2 | 0.9035 | 0.9747 | no |
| MTR | descending | T3 | 0.179 | 2 | 0.9143 | 0.9747 | no |
| MD | ascending | C5 | 0.179 | 2 | 0.9144 | 0.9747 | no |
| MTR | descending | T1 | 0.167 | 2 | 0.9200 | 0.9747 | no |
| MD | IZ | C5 | 0.159 | 2 | 0.9237 | 0.9747 | no |
| T1 | VH | T4 | 0.156 | 2 | 0.9251 | 0.9747 | no |
| T1 | VH | C3 | 0.119 | 2 | 0.9422 | 0.9747 | no |
| MD | ascending | T3 | 0.119 | 2 | 0.9423 | 0.9747 | no |
| MD | IZ | T3 | 0.105 | 2 | 0.9488 | 0.9747 | no |
| MD | IZ | C2 | 0.104 | 2 | 0.9493 | 0.9747 | no |
| MD | VH | C6 | 0.103 | 2 | 0.9499 | 0.9747 | no |
| MTR | IZ | C5 | 0.097 | 2 | 0.9525 | 0.9747 | no |
| MTR | VH | C4 | 0.066 | 2 | 0.9677 | 0.9845 | no |
| MD | VH | C5 | 0.030 | 2 | 0.9852 | 0.9929 | no |
| FA | VH | C5 | 0.026 | 2 | 0.9873 | 0.9929 | no |
| MTR | ascending | T1 | 0.005 | 2 | 0.9975 | 0.9975 | no |

Results of Kruskal-Wallis chi-square tests used for the preselection of 26 biomarkers (raw p < 0.15) for inclusion in the multivariate model. No biomarker survived false discovery rate (FDR) correction at p < 0.05.
*Abbreviations: MTR, magnetization transfer ratio; FA, fractional anisotropy; MD, mean diffusivity; IZ, intermediate zone; VH, ventral horns; Df, degrees of freedom.*

**Table S5. Component loadings from the PLS-DA model using 26 preselected imaging variables**.

The loading values reflect the relative contribution of each MRI biomarker, measured in a specific spinal cord region and at a given vertebral level, to the separation defined by the corresponding PLS-DA component. Positive or negative values indicate the direction and strength of the association with that component.

| **Variable** | **Component 1** | **Component 2** |
| --- | --- | --- |
| C2 ascending T1 | 0.21 | -0.03 |
| C2 descending MD | 0.22 | -0.23 |
| C2 VH MTR | 0.03 | -0.36 |
| C3 ascending MD | 0.19 | -0.21 |
| C3 descending T1 | 0.30 | -0.02 |
| C4 descending FA | -0.23 | 0.03 |
| C4 descending MD | 0.18 | 0.00 |
| C4 descending MTR | -0.14 | -0.08 |
| C4 descending T1 | 0.31 | 0.03 |
| C5 descending MTR | -0.14 | -0.19 |
| C6 descending FA | -0.21 | -0.15 |
| C6 descending MTR | -0.14 | -0.36 |
| C6 IZ MD | 0.12 | 0.17 |
| C6 IZ T1 | 0.19 | -0.22 |
| C6 VH MTR | 0.02 | -0.40 |
| C7 descending FA | -0.29 | -0.13 |
| C7 descending MD | 0.24 | 0.24 |
| C7 IZ MTR | -0.15 | -0.18 |
| C7 VH MTR | -0.07 | -0.29 |
| C7 VH T1 | 0.07 | 0.27 |
| T2 IZ T1 | 0.23 | -0.14 |
| T2 VH MTR | -0.21 | 0.11 |
| T3 IZ MTR | -0.24 | 0.11 |
| T5 descending FA | -0.18 | 0.13 |
| T5 descending MD | 0.21 | -0.12 |
| T5 IZ MTR | -0.21 | 0.05 |

*Abbreviations: BP, blood pressure; FA, fractional anisotropy; FDR, false discovery rate; HC, healthy controls; IZ, intermediate zone; MD, mean diffusivity; MTR, magnetization transfer ratio; PLS-DA, partial least square discriminant analysis; VH, ventral horns.*

**Table S6. Association between longitudinal changes in blood pressure drops and MRI metrics in the PDRBD(+) subgroup**

*Associations between longitudinal changes in systolic and diastolic blood pressure drops at 3 minutes from baseline to the five-year follow-up and MRI metrics were assessed using linear models. Each model included the MRI metric as the main factor, while adjusting for age, sex, and baseline systolic/diastolic blood pressure drops. Group effects were evaluated using Type II ANOVA F-tests, and resulting p-values were corrected for multiple comparisons using the FDR method, applied separately for each MRI metric type.*

** indicates significant associations after FDR correction (adjusted p<0.05) while ° indicates trends (adjusted p<0.10) .*

*Abbreviations: BP, blood pressure; CI, confidence interval; FA, fractional anisotropy; FDR, false discovery rate; IZ, intermediate zone; MD, mean diffusivity; MTR, magnetization transfer ratio; VH, ventral horns.*

# **Supplementary figures**

**Figure S1. MRI images**

Illustration of MRI sequences acquired (upper row) and corresponding derived quantitative maps (lower row).

*Abbreviations: CSA, cross-sectional area;* *FA, fractional anisotropy; MD, mean diffusivity; MTR, magnetization transfer ratio; T1, T1 longitudinal relaxation time.*

**Figure S2. ROC curves of the discrimination of HCs and PD subgroups**

Model performance was evaluated using ROC analysis on the training dataset, incorporating two components, with the AUC as the evaluation metric.

*Abbreviations: AUC, area under the ROC curve;* *HC, healthy controls; PD, Parkinson’s disease; RBD, rapid-eye movement sleep behavior disorder; ROC, receiver operating characteristic.*
